# Supplementary material for: The APC/C E3 ligase subunit ANAPC11 mediates FOXO3 protein degradation to promote cell proliferation and lymph node metastasis of urothelial bladder cancer
Source: Research Square preprint supplement (doi:10.21203/rs.3.rs-2537496/v1), 2023-03-16
Supplement: Supplementary file 1 [file 156ab6d578cb5e7433c3a28d.docx]

**Table 1.**

| **Characteristics** |  | **ANAPC11 expression** | | |  |
| --- | --- | --- | --- | --- | --- |
|  | **No. (%)** | **Low (%)** | **High (%)** | | ***P*-value** |
| Age |  |  | |  |  |
| <60 | 39 (35.5) | 30 (76.9) | | 9 (23.1) | 0.188 |
| >60 | 71 (64.5) | 46 (64.8) | | 25 (35.2) |  |
| Gender |  |  | |  |  |
| Male | 97 (88.2) | 68 (70.1) | | 29 (29.9) | 0.530 |
| Female | 13 (11.8) | 8 (61.5) | | 5 (38.5) |  |
| T status |  |  | |  |  |
| T1+2 | 88 (80) | 65 (73.9) | | 23 (26.1) | 0.03* |
| T3+4 | 22 (20) | 11 (50) | | 11 (50) |  |
| N status |  |  | |  |  |
| N0 | 95 (86.4) | 70 (73.7) | | 25 (26.3) | 0.009** |
| N1+2 | 15 (13.6) | 6 (40) | | 9 (60) |  |
| Grade |  |  | |  |  |
| Low | 18 (16.4) | 13 (72.2) | | 5 (27.8) | 0.753 |
| High | 92 (83.6) | 63 (68.5) | | 29 (31.5) |  |
| Total | 110 | 76 | | 34 |  |

Correlation of ANAPC11 expression and clinical parameters.

Chi-square test.

**P*<0.05, ***P*<0.01.
