# Supplementary material for: The APC/C E3 ligase subunit ANAPC11 mediates FOXO3 protein degradation to promote cell proliferation and lymph node metastasis of urothelial bladder cancer
Source: Research Square preprint supplement (doi:10.21203/rs.3.rs-2537496/v1), 2023-03-16
Supplement: Supplementary file 2 [file 60aa5e97491c74c7a77aaf86.docx]

**Supplementary Fig. 1 ANAPC11 could affect cell cycle and wound healing abilities of UBC cells.**

(**A**) Flow cytometry showed the distribution of different phases in UBC cells. (**B**) UBC cells’ migratory abilities valued by wound healing assays. Data was shown as mean ± SD. Unpaired, two-tailed student’s *t*-test, ***P*<0.01. Scale bar = 200 μm.
