# Supplementary material for: The APC/C E3 ligase subunit ANAPC11 mediates FOXO3 protein degradation to promote cell proliferation and lymph node metastasis of urothelial bladder cancer
Source: Research Square preprint supplement (doi:10.21203/rs.3.rs-2537496/v1), 2023-03-16
Supplement: Supplementary file 3 [file 661ddd39025c96f83eeb8e69.docx]

**Supplementary Fig. 2 ANAPC11 regulated the expression of protein FOXO3.**

(**A**) Mass spectrometry analysis of IP with anti-ANAPC11 antibodies. (**B**)The expression of ANAPC11, FOXO3 and GAPDH measured by western blot. (**C**) Relative FOXO3 mRNA expression in UBC cells transfected indicated siRNAs, measured by RT-PCR. (**D**) Western blot analysis showed the efficacy of knocking down mediated by shRNA. Data was shown as mean ± SD. Unpaired, two-tailed student’s *t*-test, **P*<0.05.
